# Supplementary material for: Cyclocodon lancifoliusfruit prolongs the lifespan ofCaenorhabditis elegans viaantioxidation and regulation of purine metabolism
Source: Royal Society of Chemistry journal article supplement (doi:10.1039/d3fo02931j), 2024-01-01
Supplement: d3fo02931j1.pdf [file d3fo02931j1.pdf]

## Supplementary Material

### *Cyclocodon lancifolius* fruit prolongs the lifespan of *Caenorhabditis elegans* via antioxidation and regulation of purine metabolism

Yihan Liu <sup>a</sup>, Xudong Zhang <sup>a</sup>, Yan Wang <sup>a</sup>, Jianxia Wang <sup>b</sup>, Hua Wei <sup>b</sup>, Cunli Zhang <sup>a,\*</sup>, Qiang Zhang <sup>a,\*</sup>

<sup>a</sup> Shaanxi Key Laboratory of Natural Products & Chemical Biology, College of Chemistry & Pharmacy, Northwest A&F University, Yangling 712100, China

<sup>b</sup> School of Pharmaceutical Sciences, Jishou University, Jishou 416000, China

#### Contents

|                                                                                                      |    |
|------------------------------------------------------------------------------------------------------|----|
| Table S1. Primers used for qRT-PCR assays.....                                                       | 2  |
| Table S2. Survival time of <i>C. elegans</i> . ....                                                  | 3  |
| Table S3. Key metabolites in <i>C. elegans</i> relevant to CF treatment. ....                        | 4  |
| Table S4 Key enzymes and corresponding genes in the purine metabolic pathway enriched by FELLA ..... | 5  |
| Fig. S1 <i>Cyclocodon lancifolius</i> (Roxb.) Kurz fruit.....                                        | 6  |
| Fig. S2 Toxic effects of CF on <i>C. elegans</i> . ....                                              | 7  |
| Fig. S3 Fluorescence images of Lipofuscin in <i>C. elegans</i> . ....                                | 8  |
| Fig. S4 Fluorescent images of ROS in <i>C. elegans</i> . ....                                        | 9  |
| Fig. S5 Classes and abundance changes of key DMs after CF treatment.....                             | 10 |

**Table S1. Primers used for qRT-PCR assays.**

| Gene's name                      | Forward (5'-3')           | Reverse (5'-3')            |
|----------------------------------|---------------------------|----------------------------|
| <i>daf-16</i>                    | CCACCACCATCATACCACGAGTTG  | GAAGAGCCGATGAAGAAGCGACAG   |
| <i>daf-2</i>                     | CCACGACGACGAGCACATCAC     | ATTGTCAGCGAACCTTCCACCAC    |
| <i>mtl-1</i>                     | TCATGGCTTGCAAGTGTGACT     | TGATGGGTCTTGTCTCCGCA       |
| <i>age-1</i>                     | GGAGCAAGGATAGGCACCAACG    | GCGAGTTCGGAGAGCACAAATGAG   |
| <i>skn-1</i>                     | TTCACCATCGTCCAACACCTCAATC | GATCATCACGCCAACGGAGACC     |
| <i>sod-3</i>                     | TCATGCCACCTACGTGAACAATCTC | AGAGCCTTGAACCGCAATAGTGATG  |
| <i>hsp-16.2</i>                  | TGCCATCAATCTCAACGTCTCACAG | CTTCGACGATTGCCTGTTGAATTGG  |
| <i>akt-1</i>                     | CGCGAAGAAGTTGCTCACAC      | GATCACCGCCAATGGCAAAC       |
| <i>xdh-1</i>                     | TCTCCGCTAACTCCTGTCTTATGC  | TGAACTGGATGAAGCCGATTCTTG   |
| <i>guk-1</i>                     | CAAAGCGGAAGCACGGACTG      | GGCGAGAAGTGAAGGAGGAAGG     |
| <i>F45F2.9</i>                   | CAGTTCTTCACGAGCACAGTAGG   | TTCATTACTCCGCTTTGTTGATTCCG |
| <i>Y71H10B.1</i>                 | CTCGTCATAAGCCTGTCGTCAAG   | AACATCCATACTCCTCGTCCATTTG  |
| <i>R09H10.3</i>                  | ATGGGCGTGTTGATTGGGTATC    | TGTAGTATGGTTCGCGTATGTAGAC  |
| <i>ZK697.8</i>                   | CAACATTCGCAACGCTACACAAC   | ATGATCCACGGTAGGTAGAGTATCC  |
| <i>ampd-1</i>                    | TTACGGAAGGAGCAAGAACGAATG  | CGAGGAATCTGAACGAGCCATC     |
| <i><math>\beta</math>-action</i> | ATCCATCGTTCACCGCAAGT      | TAAGGACAAAATGGGGCGG        |

**Table S2. Survival time of *C. elegans*.**

| Treatment                                 | Median time           | Maximum time          | Number |
|-------------------------------------------|-----------------------|-----------------------|--------|
| Control (Normal)                          | 15.6±0.3 <sup>a</sup> | 19.7±0.6 <sup>a</sup> | 180    |
| CF-L (Normal)                             | 17.5±0.5 <sup>b</sup> | 21.6±1.6 <sup>b</sup> | 182    |
| CF-M (Normal)                             | 16.5±0.5 <sup>b</sup> | 23.3±0.6 <sup>b</sup> | 176    |
| CF-H (Normal)                             | 17.1±0.3 <sup>b</sup> | 24.7±0.6 <sup>b</sup> | 175    |
| Positive (Normal)                         | 17.5±0.5 <sup>b</sup> | 24.7±0.6 <sup>b</sup> | 180    |
| Control (H <sub>2</sub> O <sub>2</sub> )  | 2.0±0.5 <sup>a</sup>  | 4.2±0.3 <sup>a</sup>  | 174    |
| CF-L (H <sub>2</sub> O <sub>2</sub> )     | 2.2±0.3 <sup>a</sup>  | 5.3±0.3 <sup>a</sup>  | 180    |
| CF-M (H <sub>2</sub> O <sub>2</sub> )     | 2.7±0.3 <sup>b</sup>  | 6.0±0.5 <sup>b</sup>  | 180    |
| CF-H (H <sub>2</sub> O <sub>2</sub> )     | 3.0±0.5 <sup>a</sup>  | 6.5±0.5 <sup>b</sup>  | 178    |
| Positive (H <sub>2</sub> O <sub>2</sub> ) | 2.8±0.8 <sup>b</sup>  | 6.7±0.3 <sup>b</sup>  | 176    |
| Control (Juglone)                         | 2.5±0.5 <sup>a</sup>  | 10.0±1.0 <sup>a</sup> | 181    |
| CF-L (Juglone)                            | 3.5±0.5 <sup>b</sup>  | 11.0±1.0 <sup>b</sup> | 174    |
| CF-M (Juglone)                            | 5.2±0.3 <sup>b</sup>  | 12.0±1.0 <sup>b</sup> | 176    |
| CF-H (Juglone)                            | 6.0±0.5 <sup>b</sup>  | 13.7±0.6 <sup>b</sup> | 174    |
| Positive (Juglone)                        | 5.2±0.3 <sup>b</sup>  | 13.3±0.6 <sup>b</sup> | 177    |
| Control (Heat)                            | 18.2±1.0 <sup>a</sup> | 21.0±1.0 <sup>a</sup> | 180    |
| CF-L (Heat)                               | 20.8±1.0 <sup>b</sup> | 25.0±1.0 <sup>b</sup> | 177    |
| CF-M (Heat)                               | 21.0±1.0 <sup>b</sup> | 26.7±1.5 <sup>b</sup> | 175    |
| CF-H (Heat)                               | 22.8±0.8 <sup>b</sup> | 28.0±1.0 <sup>b</sup> | 181    |
| Positive (Heat)                           | 22.8±0.8 <sup>b</sup> | 29.7±1.5 <sup>b</sup> | 180    |
| Control (Ultraviolet)                     | 5.8±0.3 <sup>a</sup>  | 9.7±0.6 <sup>a</sup>  | 180    |
| CF-L (Ultraviolet)                        | 7.7±0.6 <sup>b</sup>  | 12.0±1.0 <sup>b</sup> | 176    |
| CF-M (Ultraviolet)                        | 7.5±1.3 <sup>b</sup>  | 12.3±0.6 <sup>b</sup> | 174    |
| CF-H (Ultraviolet)                        | 9.2±0.8 <sup>b</sup>  | 14.0±1.0 <sup>b</sup> | 177    |
| Positive (Ultraviolet)                    | 9.5±0.5 <sup>b</sup>  | 14.7±0.6 <sup>b</sup> | 175    |

Note: All data are presented as mean ± SD (n = 3). Significant differences ( $p < 0.05$ ) between the mean values denoted by different letters in the same column. Comparisons between treatment and control groups under the same treatment condition were made (One-way ANOVA).

**Table S3. Key metabolites in *C. elegans* relevant to CF treatment.**

| KEGG ID | Metabolite name                    | RT ( min) | Formula                                                         | <i>m/z</i> | Class                            |
|---------|------------------------------------|-----------|-----------------------------------------------------------------|------------|----------------------------------|
| C00357  | N-Acetyl-D-Glucosamine 6-Phosphate | 1.18      | C <sub>8</sub> H <sub>16</sub> NO <sub>9</sub> P                | 300.05     | Carbohydrate                     |
| C00362  | dGMP                               | 1.38      | C <sub>10</sub> H <sub>14</sub> N <sub>5</sub> O <sub>7</sub> P | 346.06     | Carbohydrate                     |
| C00777  | All-trans-retinoic acid            | 1.88      | C <sub>20</sub> H <sub>28</sub> O <sub>2</sub>                  | 217.00     | Terpenoid                        |
| C00366  | Uric acid                          | 2.00      | C <sub>5</sub> H <sub>4</sub> N <sub>4</sub> O <sub>3</sub>     | 169.04     | Alkaloid                         |
| C03672  | Hydroxyphenyllactic acid           | 8.81      | C <sub>9</sub> H <sub>10</sub> O <sub>4</sub>                   | 181.05     | Shikimate and<br>Phenylpropanoid |
| C08493  | 1H-Indole-3-carboxaldehyde         | 8.85      | C <sub>9</sub> H <sub>7</sub> NO                                | 146.06     | Alkaloid                         |
| C03264  | D-Leucic acid                      | 10.23     | C <sub>6</sub> H <sub>12</sub> O <sub>3</sub>                   | 131.07     | Amino acid                       |
| C01727  | Lumichrome                         | 11.90     | C <sub>12</sub> H <sub>10</sub> N <sub>4</sub> O <sub>2</sub>   | 243.09     | Alkaloid                         |
| C12287  | beta-Ionone                        | 15.06     | C <sub>13</sub> H <sub>20</sub> O                               | 193.16     | Shikimate and<br>Phenylpropanoid |
| C05608  | (E)-3-(4-Hydroxyphenyl)-2-propenal | 16.65     | C <sub>9</sub> H <sub>8</sub> O <sub>2</sub>                    | 149.06     | Shikimate and<br>Phenylpropanoid |
| C02752  | 4-Hydroxy-6-methyl-2-pyrone        | 29.65     | C <sub>6</sub> H <sub>6</sub> O <sub>3</sub>                    | 127.04     | Polyketide                       |
| C02814  | Benzene-1,2,4-triol                | 29.77     | C <sub>6</sub> H <sub>6</sub> O <sub>3</sub>                    | 127.04     | Terpenoid                        |
| C02154  | Glyceraldehyde                     | 29.82     | C <sub>3</sub> H <sub>6</sub> O <sub>3</sub>                    | 139.02     | Carbohydrate                     |

**Table S4 Key enzymes and corresponding genes in the purine metabolic pathway enriched by FELLA**

| EC number | p score     | EC name                   | Gene ID (symbol)                                      |
|-----------|-------------|---------------------------|-------------------------------------------------------|
| 1.17.1.4  | 0.000001    | xanthine dehydrogenase    | 178381 ( <i>xdh-1</i> )                               |
| 2.7.4.8   | 0.000001    | guanylate kinase          | 171963 ( <i>guk-1</i> )                               |
| 3.1.3.89  | 0.000001    | 5'-deoxynucleotidase      | 185809 ( <i>F45F2.9</i> )                             |
| 3.1.3.5   | 2.21259E-05 | 5'-nucleotidase           | 180573 ( <i>Y71H10B.1</i> )                           |
| 1.17.3.2  | 0.005230038 | xanthine oxidase          | 178381 ( <i>xdh-1</i> )                               |
| 3.5.2.17  | 0.021952491 | hydroxyisourate hydrolase | 187757 ( <i>R09H10.3</i> ); 191414 ( <i>ZK697.8</i> ) |
| 3.5.4.6   | 0.02810366  | AMP deaminase             | 173891 ( <i>ampd-1</i> )                              |

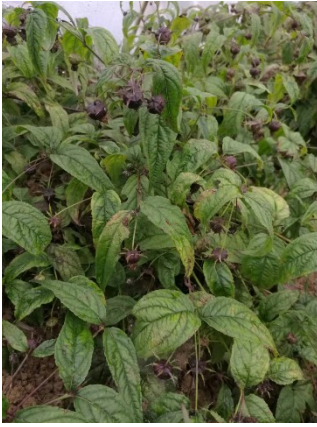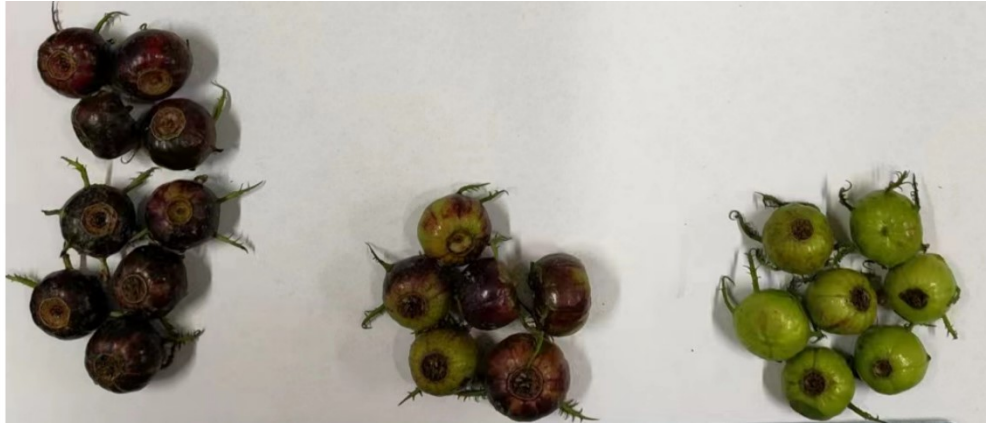

**Fig. S1** *Cyclocodon lancifolius* (Roxb.) Kurz fruit

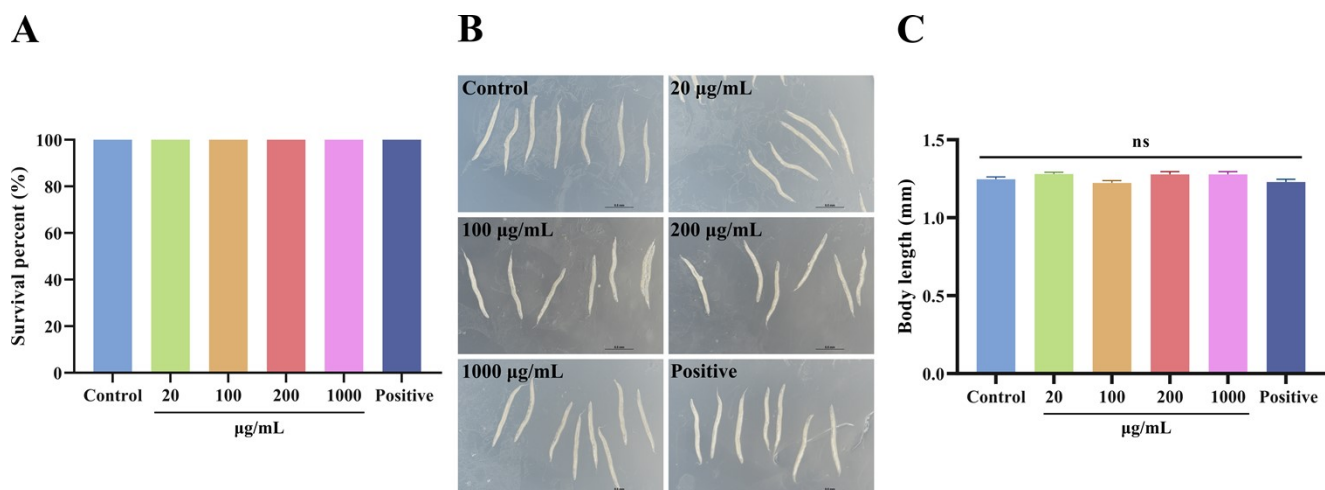

**Fig. S2** Toxic effects of CF on *C. elegans*. (A) Acute toxicity of CF at different concentrations on *C. elegans* (30 worms per group,  $n = 3$ ). (B) Images of worms cultured with or without different concentrations of CF for 5 days. (C) Statistical analysis of body length of worms in each group of B ( $n \geq 30$ ). Worms were cultured on NGM plates containing different concentrations of CF (20, 100, 200 and 1000  $\mu\text{g/mL}$ ). No CF treatment was used as a control and treated with resveratrol (100  $\mu\text{M}$ ) was a positive control. Results are presented as means  $\pm$  SEM, ns = no significant difference, compared to the control (One-way ANOVA).

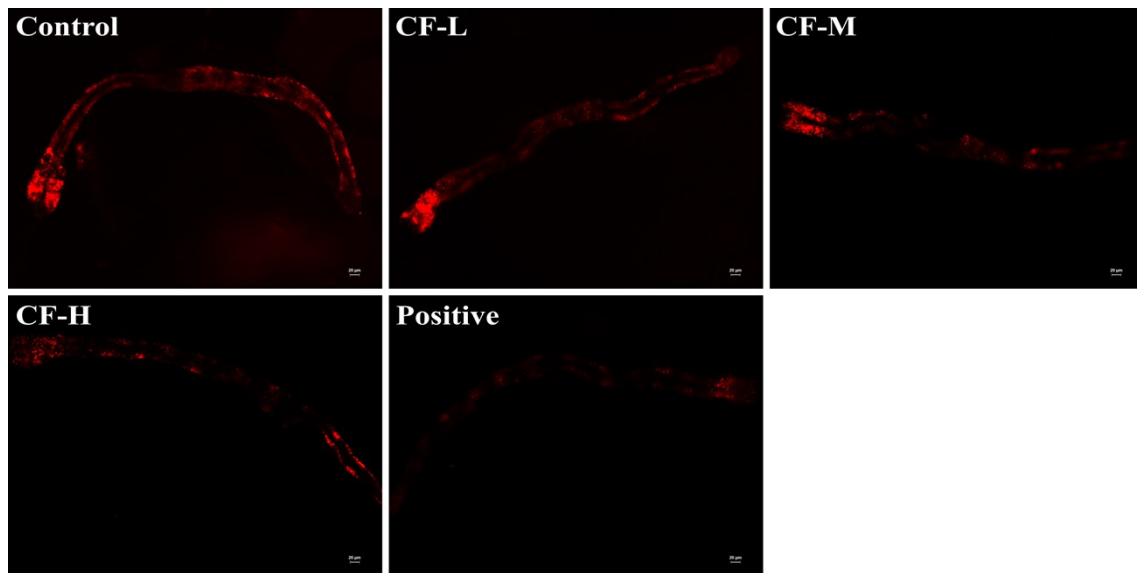

**Fig. S3** Fluorescence images of Lipofuscin in *C. elegans*. Worms were cultured on NGM medium containing CF-L (20  $\mu\text{g}/\text{mL}$ ), CF-M (100  $\mu\text{g}/\text{mL}$ ) and CF-H (200  $\mu\text{g}/\text{mL}$ ), with no treatment as a blank control and treated with resveratrol (100  $\mu\text{M}$ ) was a positive control.



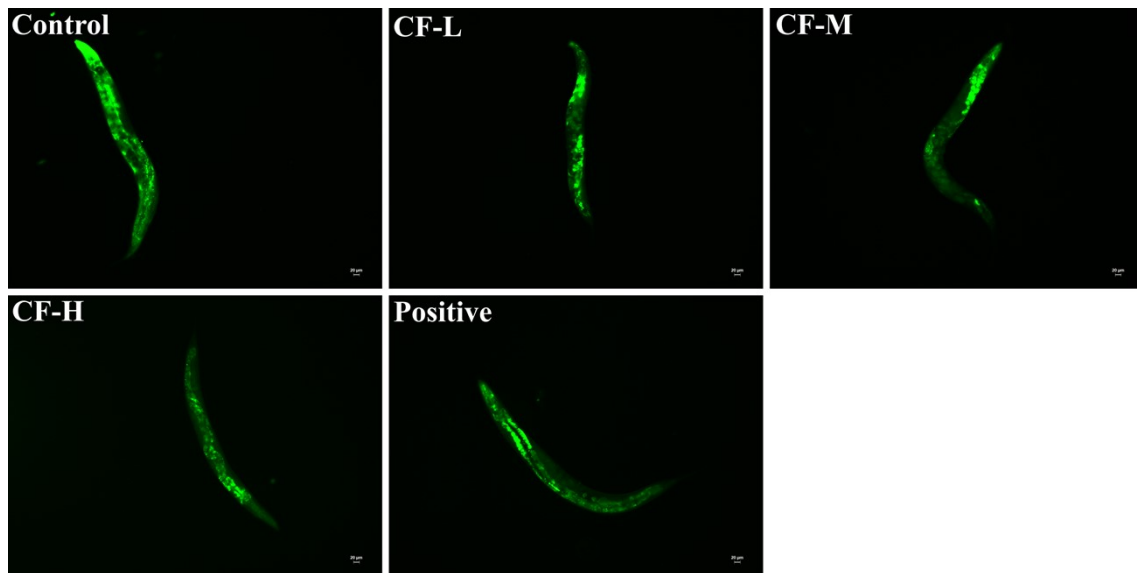

**Fig. S4** Fluorescent images of ROS in *C. elegans*. Worms were cultured on NGM medium containing CF-L (20  $\mu\text{g}/\text{mL}$ ), CF-M (100  $\mu\text{g}/\text{mL}$ ) and CF-H (200  $\mu\text{g}/\text{mL}$ ), with no treatment as a blank control and treated with resveratrol (100  $\mu\text{M}$ ) was a positive control.

**A**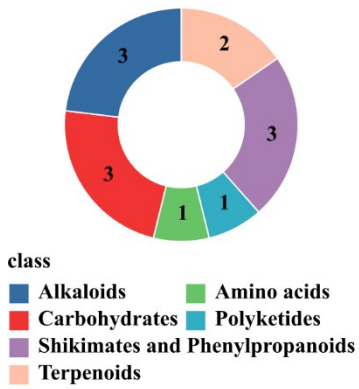**B**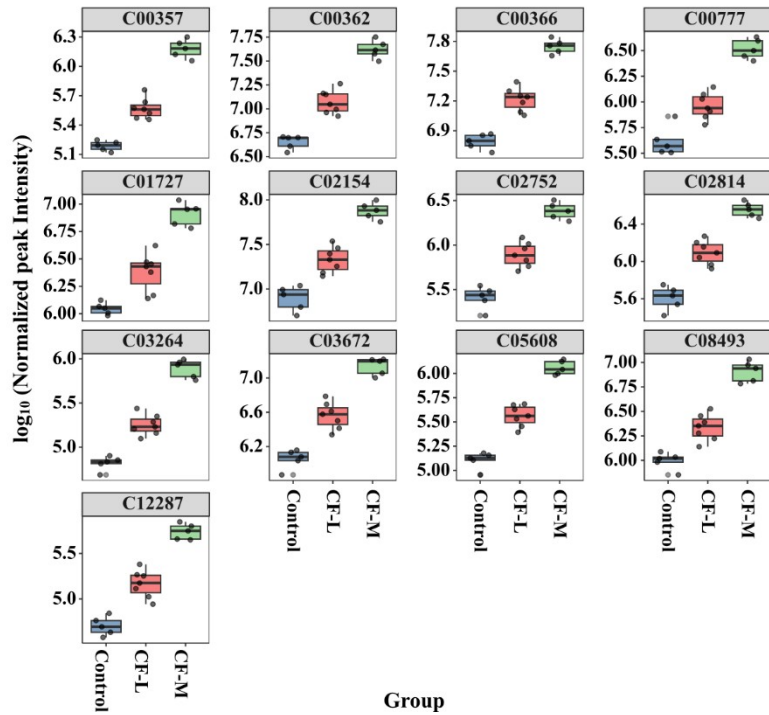

**Fig. S5** Classes and abundance changes of key DMs after CF treatment. (A) The classification of differentially regulated metabolites. (B) The relative abundance (mean  $\pm$  SD) of key differentially regulated metabolites in the control, CF-L and CF-M groups. The study included 5-7 replicates, and the worms were cultured on NGM medium supplemented with CF-L (20  $\mu$ g/mL) and CF-M (100  $\mu$ g/mL). No treatment was used as the control.
